# Supplementary material for: Queuosine modification protects cognate tRNAs against ribonuclease cleavage
Source: PubMed Central journal article supplement — RNA. 2018 Oct;24(10):1305–13. doi: 10.1261/rna.067033.118 (PMC6140461; doi:10.1261/rna.067033.118), 2018-10
Supplement: supp_067033.118_Supplemental_Figures_Table.pdf [file supp_067033.118_Supplemental_Figures_Table.pdf]

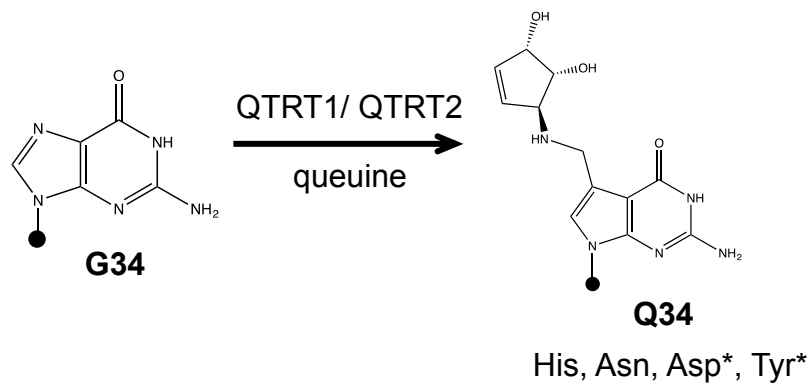

**Fig. S1. Queuosine (Q) tRNA modification in four tRNAs.** Schematic diagram of G34 to Q34 modifications in the wobble anticodon position of tRNA<sup>His/Asn/Asp/Tyr</sup>. QTRT1 and QTRT2 (formerly QTRTD1) are encoded in the human genome. Black dots represent the body of these four tRNAs; the QTRT1/QTRT2 complex introduces Q modification in the place of G. Q34 residues in tRNA<sup>Asp</sup> and tRNA<sup>Tyr</sup> are further glycosylated at the cis-diol of the modified base, indicated by asterisks. Our quantitation method measures tRNA<sup>His</sup> and tRNA<sup>Asn</sup>, but not tRNA<sup>Asp</sup> and tRNA<sup>Tyr</sup> because of their glycosylation.

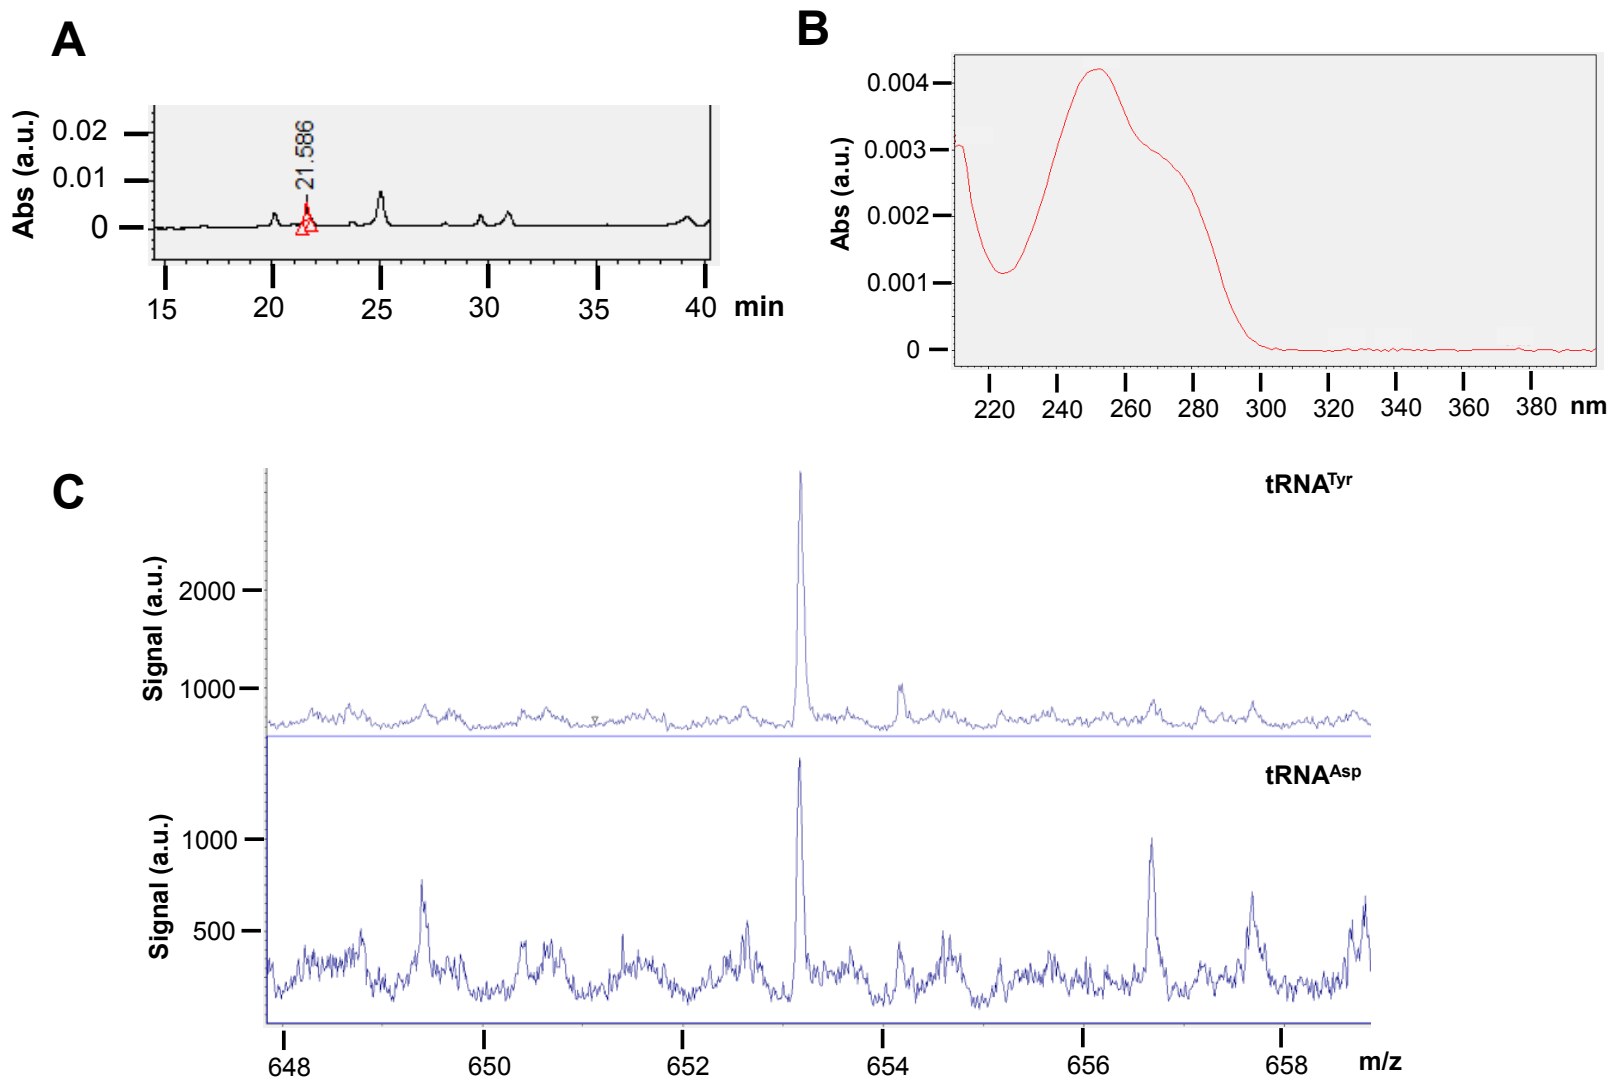

**Fig. S2: Identification of glycosylated Q-tRNA modifications by HPLC and MS.** (A) HPLC chromatogram of tRNA<sup>Tyr</sup> digested to mononucleotide 5' phosphate. (B) Absorbance of the peak at 21.586 min elution showing an absorbance peak at 253 nm and a shoulder at 275 nm, consistent with the profile of Q-modification (Costa et al., *J. Chromatography B*, 801, 237–247, 2004). (C) MALDI of the 21.586 min peak showing a m/z of 653.1 consistent with 5' phosphate of galatose-Q (galQ, tRNA<sup>Tyr</sup>, top), and mannose-Q (manQ, tRNA<sup>Asp</sup>, bottom).

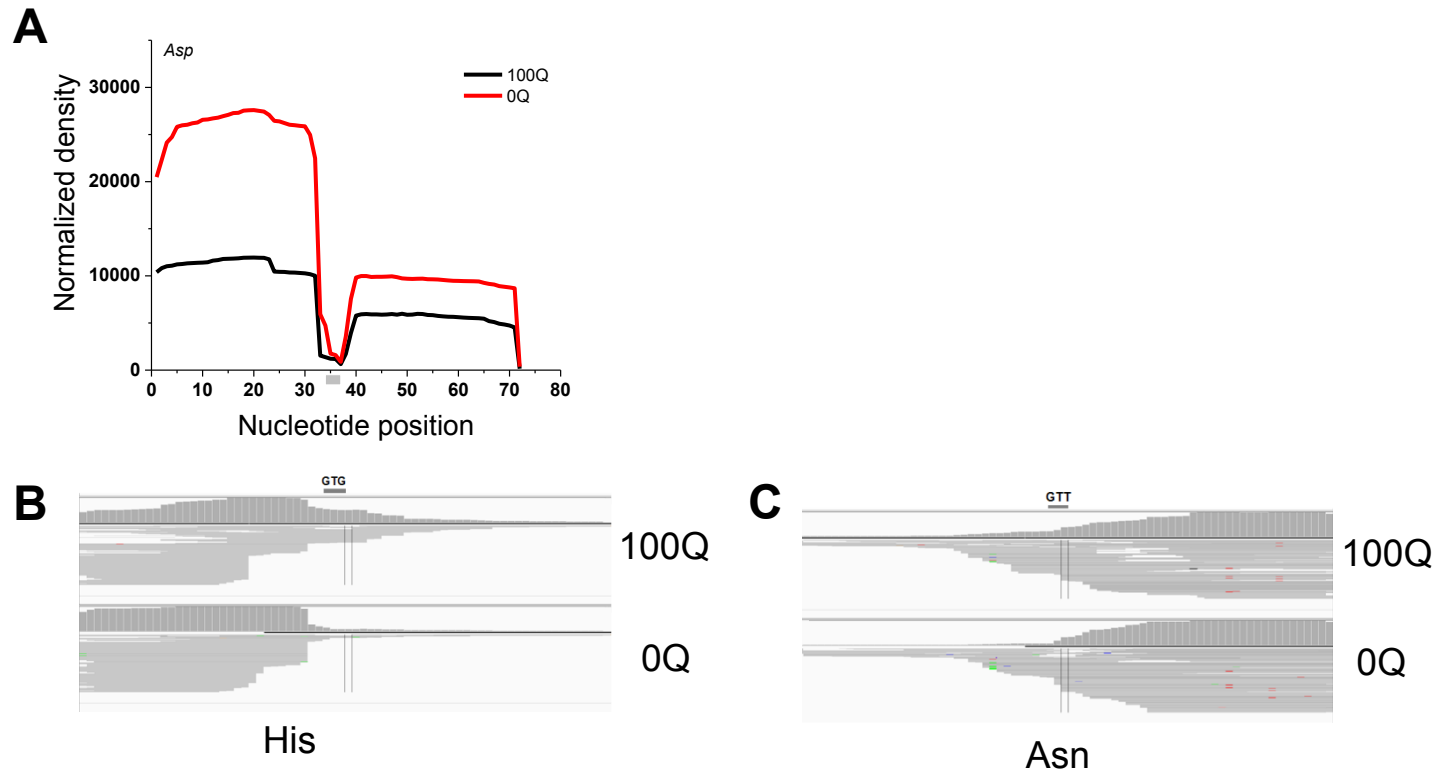

**Fig. S3. Additional tRNA fragment sequencing results.** (A) Density plot of tRNA<sup>Asp</sup> after normalization to all tRNA fragments in the individual samples. tRNA<sup>Tyr</sup> mapping is less reliable because of the highly abundant modifications in this tRNA. (B, C) IGV plots of tRNA<sup>His</sup> (B) and tRNA<sup>Asn</sup> (C) fragments from 0Q and 100Q cells showing common and distinct tRNA fragment patterns.

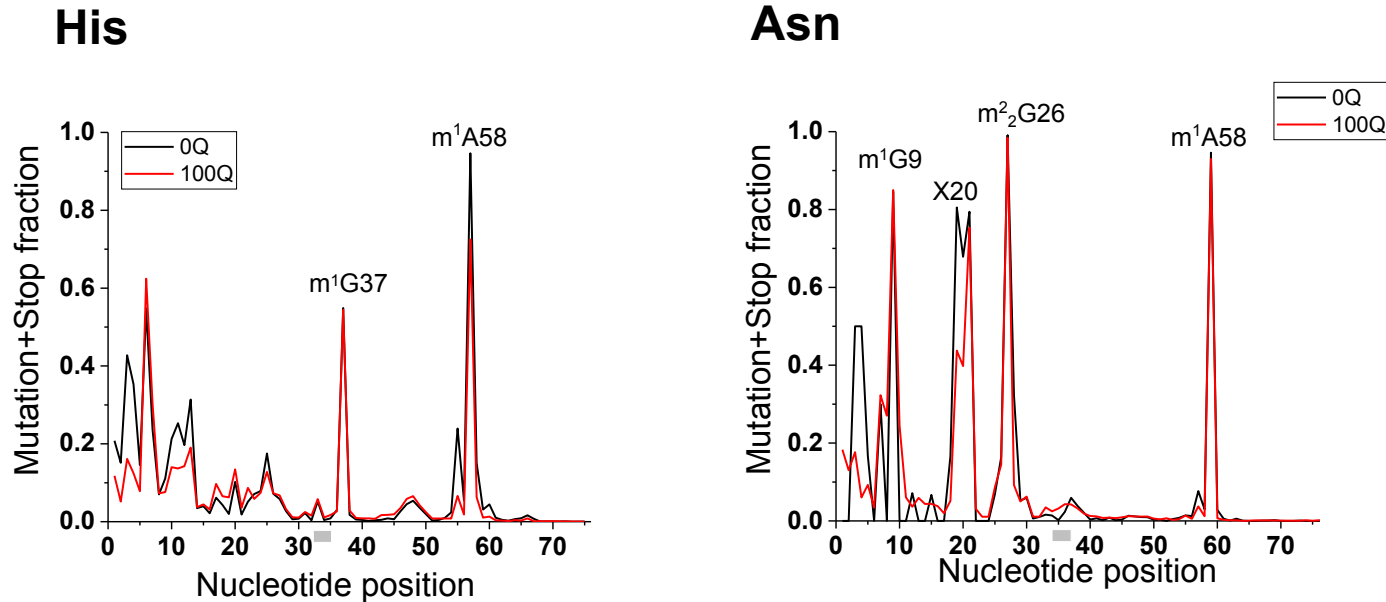

His (HeLa): D=dihydro U; P=pseudoU; K=m<sup>1</sup>G; ?=m<sup>5</sup>C; ``=m<sup>1</sup>A.

GGCCGUGAUCGUAPAGDGGDDAGUACUCUGCGPUG (Q) UGG (K) CCGCAGCAA??UCGGUPCG"AUCCGAGUCACGGCACCA

Asn (Liver, placenta): D=dihydro U; P=pseudoU; 7=m<sup>7</sup>G; 6 = t<sup>6</sup>A; K=m<sup>1</sup>G; ?=m<sup>5</sup>C; ``=m<sup>1</sup>A, R=m<sup>2</sup><sub>2</sub>G, X=acp<sup>3</sup>U.

GUCUCUGUKLCGCAADCGGDXAGCGCRPPCGGCUG (Q) UU6ACCGAAAG7DUGGUGGTPCG"GCCACCCAGGGACGCCA

**Fig. S4. Q-modification does not affect other modifications detectable by DM-tRNA-seq in tRNA<sup>His</sup> and tRNA<sup>Asn</sup>.** Shown are the sum of mutation and stop fraction at each position along tRNA<sup>His</sup> (left) and tRNA<sup>Asn</sup> (right). All modifications that interfere with Watson-Crick base pairing can be detected by this method (Clark et al., *RNA* 22, 1771-1784, 2016). The mutation+stop fraction is a proxy for modification fraction which can be compared quantitatively between two RNA samples. The known human tRNA<sup>His</sup> and tRNA<sup>Asn</sup> modifications (from Modomics) are also shown: anticodons are underlined, and the detectable modifications by sequencing are in red.

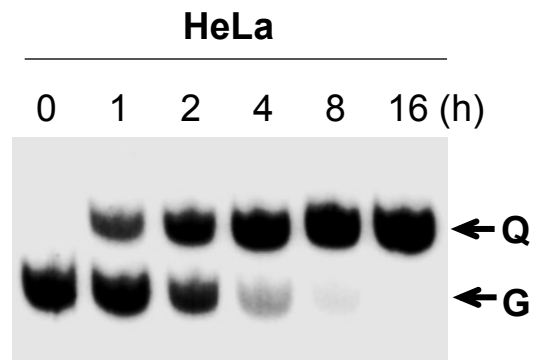

**Fig. S5. Q-modification kinetics of HeLa cells.**  
Time course of Q modification for tRNA<sup>Asn</sup> starting with HeLa 0Q cells. Q and G indicate tRNA with Q34 and G34, respectively.

**Table S1:** Percent cleavage product of Q-modified cognate tRNAs by angiogenin cleavage *in vitro* using Northern blot.

| tRNA <sup>His</sup> | -CCA | 3'halfmer | 5'halfmer |
|---------------------|------|-----------|-----------|
| 0Q, -               | 5.9  | n.d.      | n.d.      |
| 100Q, -             | 11.9 | n.d.      | n.d.      |
| 0Q, +Ang            | 40.6 | 4.9       | 2.5       |
| 100Q, +Ang          | 62.2 | 3.3       | 1.0       |
|                     |      |           |           |
| tRNA <sup>Asn</sup> |      |           |           |
| 0Q, -               | 3.9  | n.d.      | n.d.      |
| 100Q, -             | 4.8  | n.d.      | n.d.      |
| 0Q, +Ang            | 35.7 | 5.9       | 3.4       |
| 100Q, +Ang          | 54.5 | 1.0       | 0.2       |

n.d.: not detected.
